# Supplementary material
Source: PubMed Central journal article supplement (PMC3541944)
Supplement: NIHMS369759-supplement-01.pdf [file NIHMS369759-supplement-01.pdf]

**Supplementary Table 1**

|                     |                |
|---------------------|----------------|
| IRF-1               | Hs00971965_m1  |
| STAT1               | Hs01014002_m1  |
| FGF-1               | Hs0026254_m1   |
| FGF-2               | Hs00266645_m1  |
| MMP2                | Hs00234422_m1  |
| TIMP1               | Hs99999139_m1  |
| TIMP2               | Hs00234278_m1  |
| VEGF,               | Hs00173626_m1  |
| Epo                 | Hs01071097_m1  |
| iNOS                | Hs00167248_m1  |
| HAS1                | Hs 00155410_m1 |
| HAS2                | Hs00193435_m1  |
| CD44                | Hs00174139_m1  |
| E-cadherin          | Hs01023894_m1  |
| collagen 1 $\alpha$ | Hs00164004_m1  |
| integrin $\beta$ 1  | Hs00559595_m1  |
| selectin E          | Hs00174057_m1  |

**Supplementary Figure 1 Huh7 and HepG2 cells have the same tendencies as the case with PLC/PRF/5 cells.** Expression levels as detected by real-time RT-PCR

analysis. Huh7 and HepG2 cells were treated with 100  $\mu$ M CoCl<sub>2</sub> and/or 1.0 x 10<sup>3</sup> IU/ml of IFN $\alpha$  for 24 hours. Asterisks indicate significant differences (\*1, P<.001, \*2, P<.01).

**Supplementary Figure 2 The inhibitory effect of IFN $\alpha$  on VEGF expression was seen in low O<sub>2</sub> condition.** Activation of STAT1 and expression of HIF-1 $\alpha$ , STAT1, and VEGF as detected by western blot analysis. PLC/PRF/5 cells were treated with 1.0 x 10<sup>4</sup> IU/ml of IFN $\alpha$  and incubated in 1% O<sub>2</sub> concentration for 24 hours.

**Supplementary Figure 3 IFN $\gamma$  suppressed VEGF expression through inhibiting HRE-promoter activity.** (a) (b) Expression levels as detected by real-time RT-PCR analysis. Cells were treated with 100  $\mu$ M CoCl<sub>2</sub> and/or 100 ng/ml of IFN $\gamma$  for 24 hours. (c) Activation of STAT1 and expression of VEGF as detected by western blot analysis. PLC/PRF/5 cells were transfected with control siRNA or siRNA for STAT1 and subjected to each stimulation for 24 hours. (d) Expression levels of HIF-1 $\alpha$  and hydroxylated-HIF-1 $\alpha$  as detected by western blot analysis. (e) Cells were cotransfected of the pGL2TkHRE plasmid or the pGL2Tk plasmid with the pRLtk plasmid. The cells were then stimulated with 100  $\mu$ M of CoCl<sub>2</sub> units/ml and/or 100 ng/ml of IFN $\gamma$ , or left unstimulated, and subjected to dual luciferase assay. The relative light unit of the unstimulated sample was considered as 1 and the data were expressed as mean  $\pm$  S.D. Lower panel shows expression levels of STAT1 as detected by western blot analysis. Asterisks indicate significant differences (\*1, P<.001, \*2, P<.01, \*3, P<.05).

**Supplementary Figure 4 Cellular proliferation in IFN $\alpha$ -treated cells.**

PLC/PRF/5 cells were transfected with siRNA for STAT1 or control, and seeded on a

96-well culture plate, and then viable cells were assessed by water-soluble tetrazolium colorimetric assay. These cells were stimulated with  $1.0 \times 10^3$  IU/ml of IFN $\alpha$  for 4 days (left panel) or for 2 days (right panel).

**Supplementary Figure 5 Knockdown of STAT1 by siRNA method continued for more than 20 days.** Three HCC cell lines were transfected with siRNA for STAT1 and extracted at the indicated times. These cellular lysates were subjected to western blot analysis.

**Supplementary Figure 6 Human IFN $\alpha$  strongly activates STAT1 in human cell lines but less activates in mouse liver.** Activation of STAT1 as detected by western blot analysis.  $5 \times 10^6$  of PLC/PRF/5 cells were subcutaneously injected to Balb/c nude mice, and subcutaneous tumor and mouse liver were removed 10 days after transplantation. These mice were treated with  $5 \times 10^4$  IU/mouse of human IFN $\alpha$  1 hour before sacrifice.

**Supplementary Figure 7 IFN $\alpha$  has almost no effects on E-cadherin, collagen 1 $\alpha$ , integrin  $\beta$ 1, and selectin E in the absence of STAT1.** Expression levels of these molecules as detected by real-time RT-PCR analysis. PLC/PRF/5 cells were transfected with control siRNA or siRNA for STAT1 and stimulated on the next day with  $5.0 \times 10^3$  IU/ml of IFN $\alpha$  for 3 hours or left untreated. The relative expression level of the untreated cells [IFN $\alpha$  (-), STAT1 (+)] was set as 1, and the fold expression level of each type of cell was calculated.

**Supplementary Figure 8 Protein levels of VEGF were enhanced in suppressed pSTAT1 group, especially in tumor lesions.** Tumor size-matched patients between

control and suppressed pSTAT1 group were selected and their NT and T samples were subjected to western blot analysis. Representative data are presented.
